# Supplementary material for: Dinuclear gold(i) complexes of bridging bidentate carbene ligands: synthesis, structure and spectroscopic characterisation
Source: Royal Society of Chemistry journal article supplement (doi:10.1039/b316804b), 2004-01-01

**Electronic Supplementary Information for:**

**Dinuclear gold(I) complexes of bridging bidentate carbene ligands: synthesis, structure and spectroscopic characterisation**

**Peter J. Barnard, Murray V. Baker,\* Susan J. Berners-Price,\* Brian W. Skelton and Allan H. White**

Chemistry, School of Biomedical and Chemical Sciences, The University of Western Australia, 35 Stirling Highway, Crawley, WA 6009, Australia

---

**Fig. S1** (a) Unit cell contents of **3** projected down *b*, showing the layering of the structure.

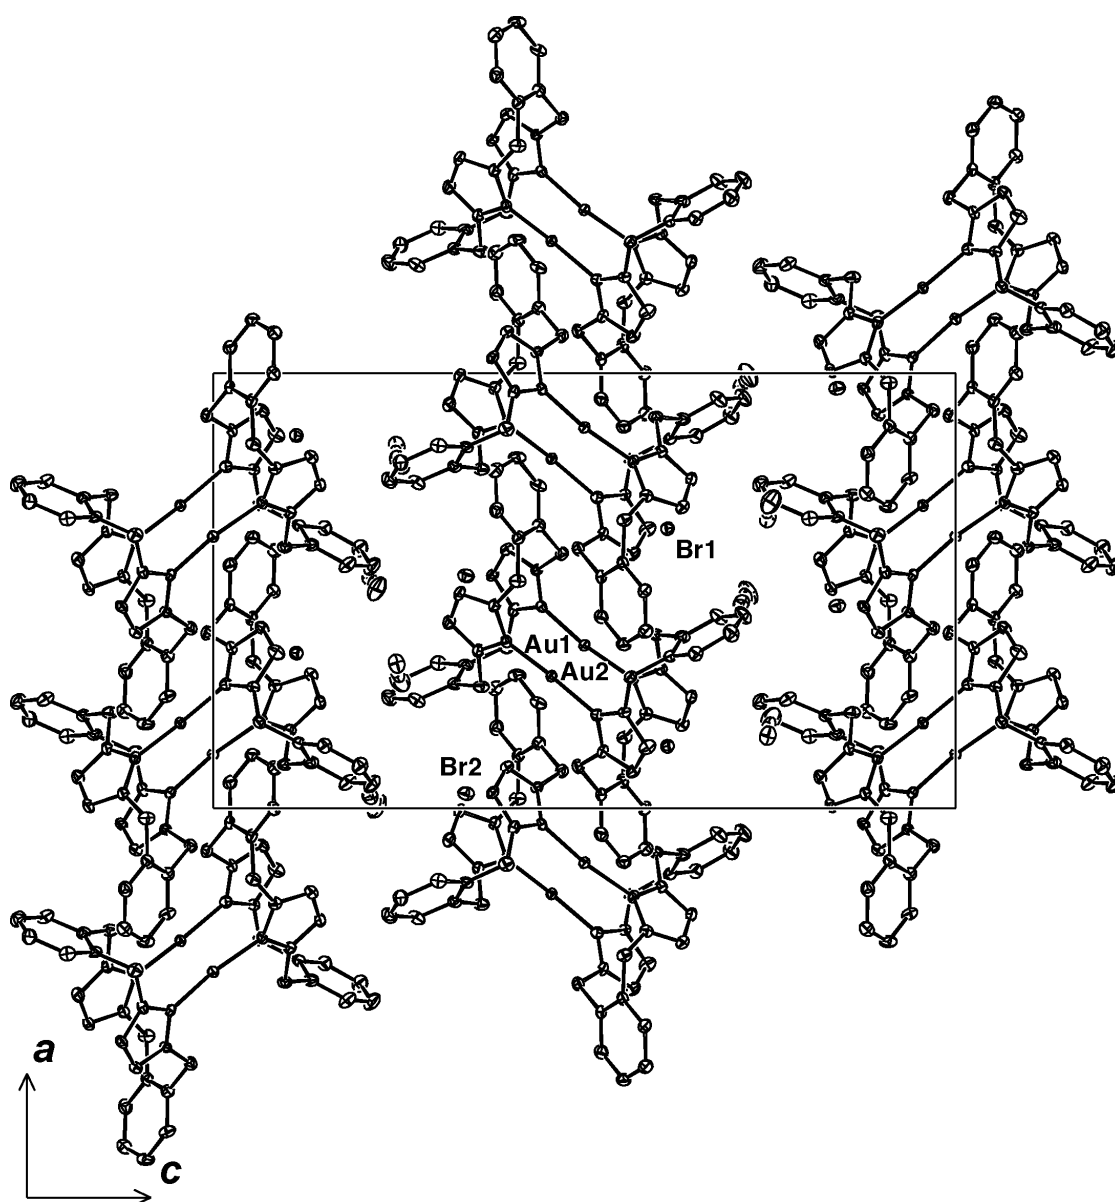

**Fig. S1** (b) A single layer of **3** projected down *c*.

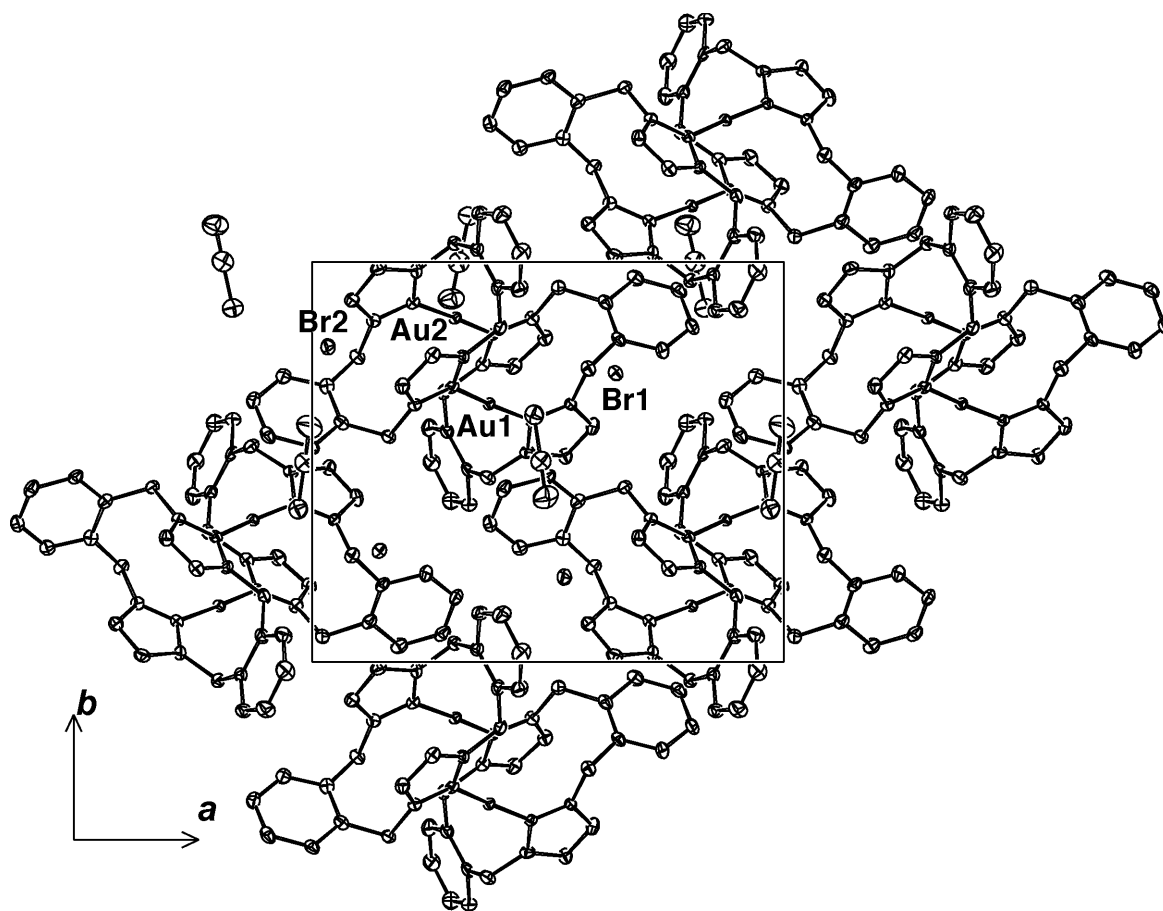

**Fig. S2** Unit cell contents of **9**, projected down *a*.

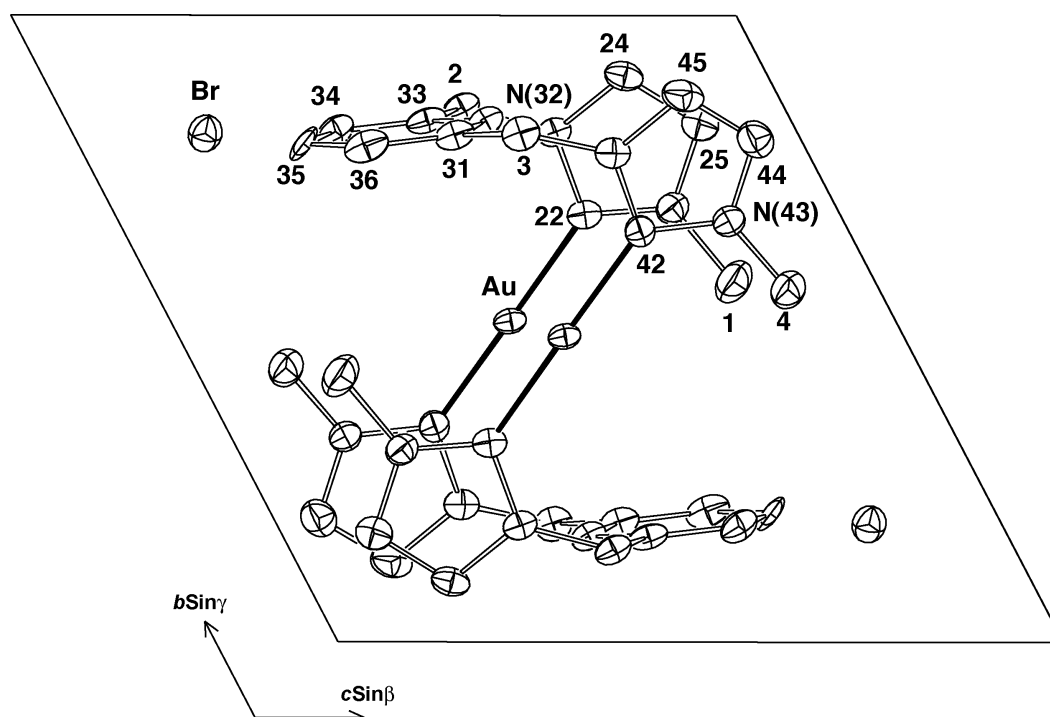

Supplement: b316804b.pdf [file b316804b.pdf]
